# Supplementary material for: Relationships of depression and antidepressant use with epigenetic age acceleration and all-cause mortality among postmenopausal women
Source: publisher site journal article supplement (doi:10.18632/aging.205868), 2024-05-27
Supplement: Supplementary file [file aging-v16i10-205868-supplementary-material-SD1.pdf]

**SUPPLEMENTARY FIGURE**

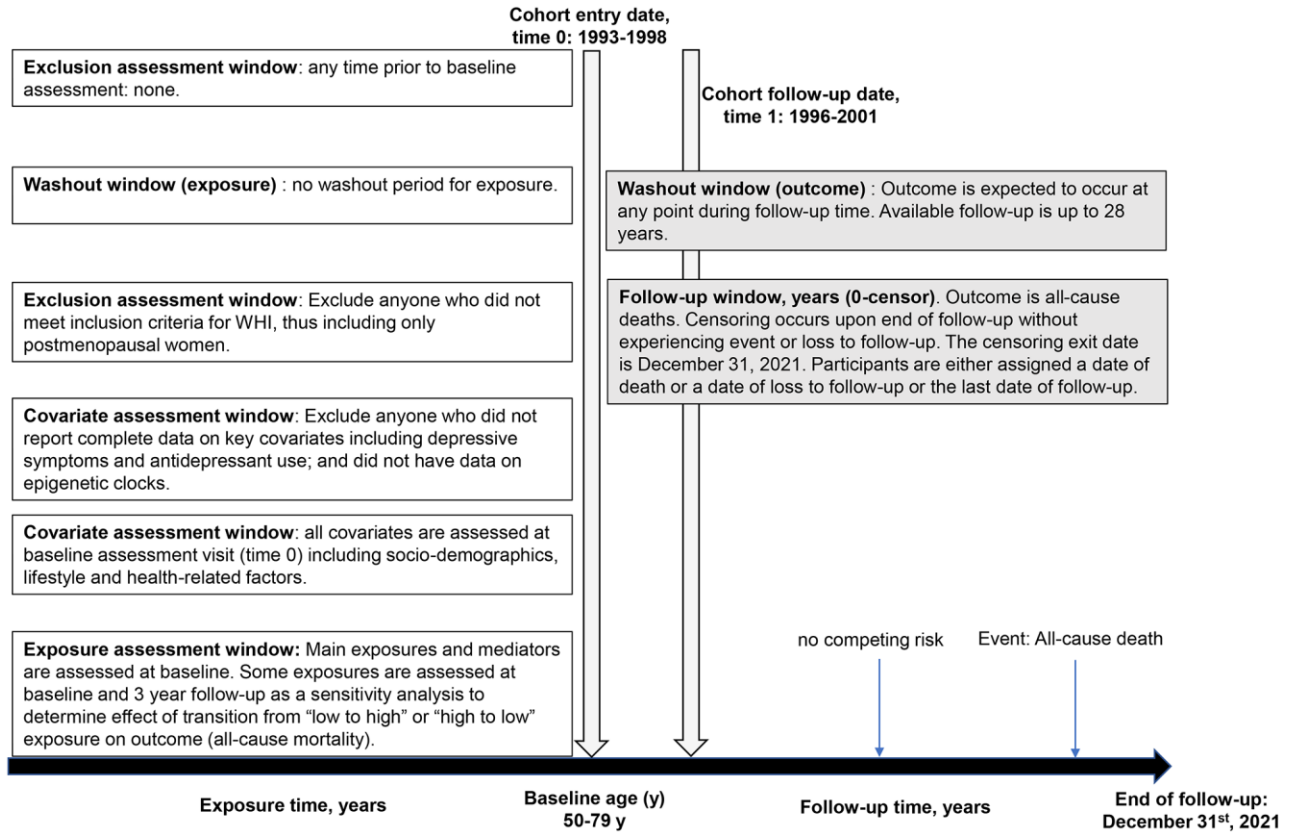

**Supplementary Figure 1. Graphical depiction of the study design.**
