# Supplementary material for: Relationships of depression and antidepressant use with epigenetic age acceleration and all-cause mortality among postmenopausal women
Source: publisher site journal article supplement (doi:10.18632/aging.205868), 2024-05-27
Supplement: Supplementary file [file aging-v16i10-205868-supplementary-material-SD2.pdf]

**SUPPLEMENTARY TABLE**

**Supplementary Table 1. Causal mediation analysis (four-way decomposition models) of the total effects of epigenetic age acceleration measures on mortality risk with baseline elevated depressive symptoms (EDS), antidepressant use (ANTIDEP) or combined exposure (EDS\_ANTIDEP) as alternative mediators and/or moderators (n = 1,900).**

| X             | M       | Four-way decomposition parameter | MODEL 1         |                 |                  | MODEL 2         |                 |                  | MODEL 3         |                 |                  |
|---------------|---------|----------------------------------|-----------------|-----------------|------------------|-----------------|-----------------|------------------|-----------------|-----------------|------------------|
|               |         |                                  | $\beta$         | SE              | P                | $\beta$         | SE              | P                | $\beta$         | SE              | P                |
| IEAA          | EDS     | TE                               | 0.027407        | 0.030382        | 0.367            | <b>0.06012</b>  | <b>0.03075</b>  | <b>0.051</b>     | 0.042168        | 0.030107        | 0.161            |
| IEAA          | EDS     | CDE                              | 0.035034        | 0.03177         | 0.27             | <b>0.071997</b> | <b>0.032002</b> | <b>0.024</b>     | <b>0.053996</b> | <b>0.031653</b> | <b>0.088</b>     |
| IEAA          | EDS     | INTREF                           | -0.00817        | 0.011681        | 0.484            | -0.01217        | 0.01102         | 0.269            | -0.01324        | 0.008621        | 0.125            |
| IEAA          | EDS     | INTMED                           | 0.000537        | 0.000921        | 0.56             | 0.000536        | 0.000938        | 0.567            | 0.000969        | 0.001073        | 0.367            |
| IEAA          | EDS     | PIE                              | 7.09E-06        | 0.000682        | 0.992            | -2.44E-04       | 0.000571        | 0.669            | 4.40E-04        | 0.000734        | 0.549            |
| EEAA          | EDS     | TE                               | <b>0.11742</b>  | <b>0.033331</b> | <b>&lt;0.001</b> | <b>0.129132</b> | <b>0.034021</b> | <b>&lt;0.001</b> | <b>0.113847</b> | <b>0.033864</b> | <b>0.001</b>     |
| EEAA          | EDS     | CDE                              | <b>0.118629</b> | <b>0.034891</b> | <b>0.001</b>     | <b>0.135227</b> | <b>0.035315</b> | <b>&lt;0.001</b> | <b>0.12437</b>  | <b>0.035931</b> | <b>0.001</b>     |
| EEAA          | EDS     | INTREF                           | -0.00093        | 0.012225        | 0.939            | -0.00599        | 0.011984        | 0.617            | -0.0098         | 0.009416        | 0.298            |
| EEAA          | EDS     | INTMED                           | -0.00011        | 0.001445        | 0.939            | -0.00049        | 0.001079        | 0.648            | -0.00045        | 0.00084         | 0.591            |
| EEAA          | EDS     | PIE                              | -0.00017        | 0.001231        | 0.891            | 0.000391        | 0.000895        | 0.662            | -0.00027        | 0.00059         | 0.641            |
| AgeAccelPheno | EDS     | TE                               | <b>0.182011</b> | <b>0.035843</b> | <b>&lt;0.001</b> | <b>0.204541</b> | <b>0.037093</b> | <b>&lt;0.001</b> | <b>0.161381</b> | <b>0.035735</b> | <b>&lt;0.001</b> |
| AgeAccelPheno | EDS     | CDE                              | <b>0.180454</b> | <b>0.036805</b> | <b>&lt;0.001</b> | <b>0.208895</b> | <b>0.037995</b> | <b>&lt;0.001</b> | <b>0.166715</b> | <b>0.037244</b> | <b>&lt;0.001</b> |
| AgeAccelPheno | EDS     | INTREF                           | 0.001544        | 0.0146          | 0.916            | -0.00437        | 0.01418         | 0.758            | -0.00549        | 0.011299        | 0.627            |
| AgeAccelPheno | EDS     | INTMED                           | 0.000073        | 0.000699        | 0.917            | -7.8E-05        | 0.000395        | 0.843            | 8.05E-05        | 0.00042         | 0.848            |
| AgeAccelPheno | EDS     | PIE                              | -5.9E-05        | 0.0005          | 0.906            | 9.41E-05        | 0.000404        | 0.816            | 0.00008         | 0.000408        | 0.844            |
| AgeAccelGrim  | EDS     | TE                               | <b>0.29565</b>  | <b>0.036358</b> | <b>&lt;0.001</b> | <b>0.327529</b> | <b>0.040086</b> | <b>&lt;0.001</b> | <b>0.265959</b> | <b>0.046626</b> | <b>&lt;0.001</b> |
| AgeAccelGrim  | EDS     | CDE                              | <b>0.316078</b> | <b>0.039023</b> | <b>&lt;0.001</b> | <b>0.339236</b> | <b>0.042165</b> | <b>&lt;0.001</b> | <b>0.281169</b> | <b>0.048263</b> | <b>&lt;0.001</b> |
| AgeAccelGrim  | EDS     | INTREF                           | -0.01662        | 0.011246        | 0.139            | -0.01055        | 0.011877        | 0.374            | -0.01472        | 0.009771        | 0.132            |
| AgeAccelGrim  | EDS     | INTMED                           | -0.0031         | 0.002411        | 0.198            | -0.00164        | 0.00201         | 0.414            | -0.0004         | 0.001308        | 0.761            |
| AgeAccelGrim  | EDS     | PIE                              | -0.0007         | 0.001953        | 0.719            | 0.000488        | 0.001585        | 0.758            | -8.9E-05        | 0.000384        | 0.817            |
| IEAA          | ANTIDEP | TE                               | 0.026303        | 0.03095         | 0.395            | <b>0.062246</b> | <b>0.031143</b> | <b>0.046</b>     | 0.04036         | 0.03044         | 0.185            |
| IEAA          | ANTIDEP | CDE                              | 0.027571        | 0.030524        | 0.366            | <b>0.061114</b> | <b>0.030954</b> | <b>0.048</b>     | 0.043247        | 0.030582        | 0.157            |
| IEAA          | ANTIDEP | INTREF                           | -0.00359        | 0.011851        | 0.762            | -0.00149        | 0.010693        | 0.889            | -0.00438        | 0.009414        | 0.641            |
| IEAA          | ANTIDEP | INTMED                           | -0.0003         | 0.001045        | 0.773            | -0.00012        | 0.000896        | 0.891            | -0.00031        | 0.000785        | 0.69             |
| IEAA          | ANTIDEP | PIE                              | 0.002623        | 0.002858        | 0.359            | 0.002745        | 0.003175        | 0.387            | 0.001811        | 0.002421        | 0.454            |
| EEAA          | ANTIDEP | TE                               | <b>0.128582</b> | <b>0.034868</b> | <b>&lt;0.001</b> | <b>0.139916</b> | <b>0.035274</b> | <b>&lt;0.001</b> | <b>0.112495</b> | <b>0.034025</b> | <b>0.001</b>     |
| EEAA          | ANTIDEP | CDE                              | <b>0.106216</b> | <b>0.033128</b> | <b>0.001</b>     | <b>0.12211</b>  | <b>0.033749</b> | <b>&lt;0.001</b> | <b>0.108782</b> | <b>0.034044</b> | <b>0.001</b>     |
| EEAA          | ANTIDEP | INTREF                           | 0.01743         | 0.014849        | 0.24             | 0.014681        | 0.014246        | 0.303            | 0.002495        | 0.01067         | 0.815            |
| EEAA          | ANTIDEP | INTMED                           | 0.001828        | 0.002218        | 0.41             | 0.00097         | 0.001661        | 0.559            | 0.000112        | 0.000534        | 0.834            |
| EEAA          | ANTIDEP | PIE                              | 0.003109        | 0.002902        | 0.284            | 0.002155        | 0.003117        | 0.489            | 0.001107        | 0.002326        | 0.634            |
| AgeAccelGrim  | ANTIDEP | TE                               | <b>0.178892</b> | <b>0.035431</b> | <b>&lt;0.001</b> | <b>0.205059</b> | <b>0.036746</b> | <b>&lt;0.001</b> | <b>0.162047</b> | <b>0.035753</b> | <b>&lt;0.001</b> |
| AgeAccelGrim  | ANTIDEP | CDE                              | <b>0.184241</b> | <b>0.036073</b> | <b>&lt;0.001</b> | <b>0.207841</b> | <b>0.037352</b> | <b>&lt;0.001</b> | <b>0.167278</b> | <b>0.036557</b> | <b>&lt;0.001</b> |
| AgeAccelGrim  | ANTIDEP | INTREF                           | -0.00467        | 0.011651        | 0.689            | -0.00208        | 0.011179        | 0.852            | -0.00379        | 0.009531        | 0.691            |
| AgeAccelGrim  | ANTIDEP | INTMED                           | 0.000119        | 0.000481        | 0.805            | 4.57E-05        | 0.000304        | 0.881            | 0.000248        | 0.000704        | 0.725            |
| AgeAccelGrim  | ANTIDEP | PIE                              | -0.0008         | 0.00256         | 0.754            | -0.00074        | 0.002935        | 0.8              | -0.00169        | 0.00228         | 0.458            |
| AgeAccelGrim  | ANTIDEP | TE                               | <b>0.296287</b> | <b>0.036399</b> | <b>&lt;0.001</b> | <b>0.330774</b> | <b>0.040302</b> | <b>&lt;0.001</b> | <b>0.26638</b>  | <b>0.046889</b> | <b>&lt;0.001</b> |
| AgeAccelGrim  | ANTIDEP | CDE                              | <b>0.286615</b> | <b>0.037212</b> | <b>&lt;0.001</b> | <b>0.30887</b>  | <b>0.040733</b> | <b>&lt;0.001</b> | <b>0.260132</b> | <b>0.046933</b> | <b>&lt;0.001</b> |
| AgeAccelGrim  | ANTIDEP | INTREF                           | 0.004317        | 0.010551        | 0.682            | 0.01278         | 0.011209        | 0.254            | 0.002445        | 0.009382        | 0.794            |
| AgeAccelGrim  | ANTIDEP | INTMED                           | 0.00074         | 0.001848        | 0.689            | 0.002878        | 0.002815        | 0.307            | 0.000348        | 0.00138         | 0.801            |

|              |             |        |                 |                 |                  |                 |                 |                  |                 |                 |                  |
|--------------|-------------|--------|-----------------|-----------------|------------------|-----------------|-----------------|------------------|-----------------|-----------------|------------------|
| AgeAccelGrim | ANTIDEP     | PIE    | 0.004616        | 0.003005        | 0.124            | 0.006246        | 0.003503        | 0.075            | 0.003455        | 0.003124        | 0.269            |
| IEAA         | EDS_ANTIDEP | TE     | 0.024951        | 0.030867        | 0.419            | <b>0.05628</b>  | <b>0.03108</b>  | <b>0.07</b>      | 0.037564        | 0.030254        | 0.214            |
| IEAA         | EDS_ANTIDEP | CDE    | 0.034332        | 0.031718        | 0.279            | <b>0.07147</b>  | <b>0.032069</b> | <b>0.026</b>     | <b>0.05517</b>  | <b>0.03191</b>  | <b>0.084</b>     |
| IEAA         | EDS_ANTIDEP | INTREF | -0.00942        | 0.016635        | 0.571            | -0.01548        | 0.015928        | 0.331            | -0.01757        | 0.013783        | 0.202            |
| IEAA         | EDS_ANTIDEP | INTMED | -1.6E-05        | 0.000487        | 0.974            | -0.00018        | 0.000855        | 0.832            | 0.000175        | 0.000962        | 0.856            |
| IEAA         | EDS_ANTIDEP | PIE    | 5.76E-05        | 0.001767        | 0.974            | 0.000472        | 0.002178        | 0.828            | -0.00021        | 0.001168        | 0.855            |
| EEAA         | EDS_ANTIDEP | TE     | <b>0.118092</b> | <b>0.033739</b> | <b>&lt;0.001</b> | <b>0.127094</b> | <b>0.034381</b> | <b>&lt;0.001</b> | <b>0.109143</b> | <b>0.033757</b> | <b>0.001</b>     |
| EEAA         | EDS_ANTIDEP | CDE    | <b>0.113213</b> | <b>0.034885</b> | <b>0.001</b>     | <b>0.13155</b>  | <b>0.035283</b> | <b>&lt;0.001</b> | <b>0.124907</b> | <b>0.036301</b> | <b>0.001</b>     |
| EEAA         | EDS_ANTIDEP | INTREF | 0.002157        | 0.017292        | 0.901            | -0.00579        | 0.017534        | 0.741            | -0.01582        | 0.014508        | 0.276            |
| EEAA         | EDS_ANTIDEP | INTMED | 0.000169        | 0.001361        | 0.901            | -0.00023        | 0.000765        | 0.765            | -0.00017        | 0.000901        | 0.846            |
| EEAA         | EDS_ANTIDEP | PIE    | 0.002552        | 0.002113        | 0.227            | 0.001559        | 0.002269        | 0.492            | 0.000231        | 0.00118         | 0.845            |
| AgeAccelGrim | EDS_ANTIDEP | TE     | <b>0.178451</b> | <b>0.035762</b> | <b>&lt;0.001</b> | <b>0.20038</b>  | <b>0.036953</b> | <b>&lt;0.001</b> | <b>0.160073</b> | <b>0.03576</b>  | <b>&lt;0.001</b> |
| AgeAccelGrim | EDS_ANTIDEP | CDE    | <b>0.183306</b> | <b>0.037339</b> | <b>&lt;0.001</b> | <b>0.213135</b> | <b>0.038619</b> | <b>&lt;0.001</b> | <b>0.174037</b> | <b>0.03809</b>  | <b>&lt;0.001</b> |
| AgeAccelGrim | EDS_ANTIDEP | INTREF | -0.0051         | 0.018362        | 0.781            | -0.01258        | 0.018163        | 0.489            | -0.01358        | 0.015672        | 0.386            |
| AgeAccelGrim | EDS_ANTIDEP | INTMED | -4.4E-05        | 0.000308        | 0.887            | 8.09E-05        | 0.000681        | 0.905            | 0.000586        | 0.000997        | 0.557            |
| AgeAccelGrim | EDS_ANTIDEP | PIE    | 0.000291        | 0.001762        | 0.869            | -0.00026        | 0.002156        | 0.904            | -0.00097        | 0.001334        | 0.469            |
| AgeAccelGrim | EDS_ANTIDEP | TE     | <b>0.293954</b> | <b>0.036326</b> | <b>&lt;0.001</b> | <b>0.326586</b> | <b>0.040187</b> | <b>&lt;0.001</b> | <b>0.264104</b> | <b>0.046683</b> | <b>&lt;0.001</b> |
| AgeAccelGrim | EDS_ANTIDEP | CDE    | <b>0.303576</b> | <b>0.039729</b> | <b>&lt;0.001</b> | <b>0.3254</b>   | <b>0.042934</b> | <b>&lt;0.001</b> | <b>0.282577</b> | <b>0.048697</b> | <b>&lt;0.001</b> |
| AgeAccelGrim | EDS_ANTIDEP | INTREF | -0.01186        | 0.01562         | 0.448            | -0.00329        | 0.01692         | 0.846            | -0.01859        | 0.014623        | 0.204            |
| AgeAccelGrim | EDS_ANTIDEP | INTMED | -0.00175        | 0.002395        | 0.465            | -0.0005         | 0.002567        | 0.846            | -0.00047        | 0.001317        | 0.721            |
| AgeAccelGrim | EDS_ANTIDEP | PIE    | 0.003991        | 0.002595        | 0.124            | <b>0.00498</b>  | <b>0.0029</b>   | <b>0.086</b>     | 0.000593        | 0.001632        | 0.717            |

Abbreviations: AgeAccel GrimAge: GrimAge epigenetic age acceleration; AgeAccel Pheno: PhenoAge epigenetic age acceleration; ANTIDEP: Antidepressant use; CDE: Controlled Direct Effect; EDS: Elevated Depressive Symptoms; EDS\_ANTIDEP: Either EDS or ANTIDEP; EEAA: Extrinsic Epigenetic Age Acceleration; HR: Hazard Ratio; IEAA: Intrinsic Epigenetic Age Acceleration; INTMED: Mediated Interaction; INTREF: Interaction Referent; PIE: Pure Indirect Effect; SE: Standard Error; TE: Total Effect; X: Exposure. Values are estimates  $\pm$  SE from four-way decomposition models and their  $p$ -values, with final equation being a Cox PH model for all-cause mortality, mediators being each of the EDS and antidepressant use baseline mediators; and exposures being each of the epigenetic clock metrics. Model 1 is unadjusted; Model 2 adjusted for sociodemographic; Model 3 is Model 2 further adjusted for lifestyle and health characteristics. P is for null hypothesis that  $\beta = 0$ . Bolded values are when  $P < 0.05$ .
